# Supplementary material
Source: Springer Nature journal article supplement (http://www.springermedizin.de/resource/supplementary/12947_2009_294_MOESM2_ESM.pdf/9556636)

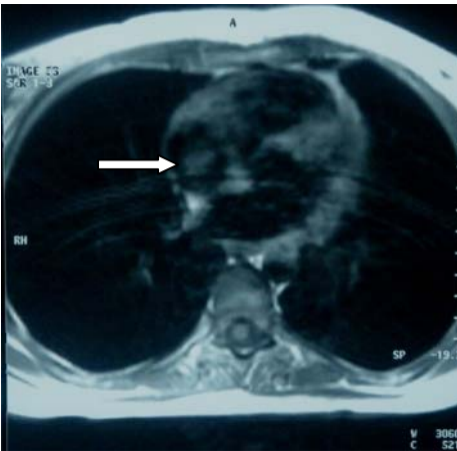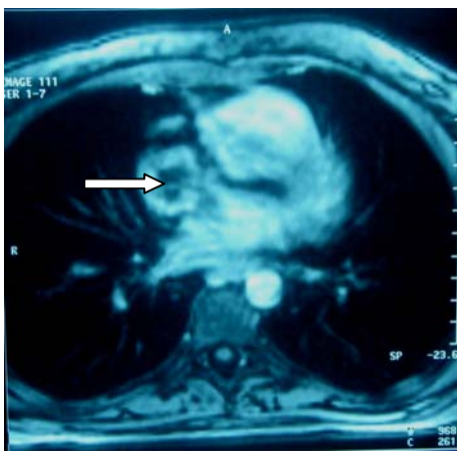

Supplement: MOESM2 [file 9556636]
